# Supplementary material for: How do practitioners prescribe exercise to patients with breast cancer? Professional perspectives on the implementation of aerobic exercise guidelines for patients with breast cancer undergoing chemotherapy.
Source: Research Square preprint supplement (doi:10.21203/rs.3.rs-2236450/v1), 2022-11-08
Supplement: Supplementary file 1 [file 8dd5b610dffc00e99e7e1a57.docx]

**Supplementary Digital Content**

***List of Contents (in order of appearance):***

**Table 1**. Phase, 1, round 1: open-ended questions presented to AEPs, oncologists, and breast cancer surgeons.

**Table 2.** Subjective questions derived from responses in phase 1, round 1, with agreement achieved for each question after each phase.

**Table 3.** Objective assessments derived from responses in phase 1, round 1, with agreement achieved for each assessment after each phase.

**Table 4.** Referral information derived from responses in phase 1, round 1, with agreement achieved for each question after each phase.

**Table 5.** FITT principles derived from responses in phase 1, round 1, with agreement achieved for each principle after each phase.

**Table 6.** General exercise prescription recommendations derived from responses in phase 1, round 1, with agreement achieved for each question after each phase.

| **Section 1 Topic:** What are the key considerations that must be accounted for when prescribing exercise to breast cancer patients undergoing chemotherapy? | |
| --- | --- |
| **Question 1:** | When prescribing exercise for a patient with breast cancer undergoing chemotherapy, what key things should an exercise physiologist ask, observe, screen for, or assess? |
| **Question 2:** | What factors limit exercise adherence in breast cancer patients undergoing chemotherapy, and how could these be managed and/or overcome? |
| **Question 3:** | What information or test results would be needed to tailor an exercise program to patients with breast cancer undergoing chemotherapy? |
| **Question 4:** | What condition specific outcome goals should be set for breast cancer patients undergoing chemotherapy when designing an exercise program? |
| **Question 5:** | What outcomes should an exercise program aim to achieve in breast cancer patients undergoing chemotherapy? |
| **Section 2 Topic:** What are the optimal aerobic exercise prescription parameters relating to frequency, intensity, duration, and type for breast cancer patients undergoing chemotherapy? | |
| **Question 6:** | Which of the proposed guideline/s do you believe would be best suited to breast cancer patients undergoing chemotherapy? (can select more than one) |
| **Question 7:** | Regarding the guideline/s that you believe to be best suited to breast cancer patients undergoing chemotherapy, what do you specifically agree with?  *if you disagree with all guidelines, please provide "n/a" response to this question. |
| **Question 8:** | What, if anything, would you add or change about the guideline/s you agree most with to make it more appropriate for breast cancer patients undergoing chemotherapy?  *if you disagree with all guidelines, please provide "n/a" response to this question. |
| **Question 9:** | Of the guideline/s you believe are NOT suited to breast cancer patients undergoing chemotherapy, what do you disagree with? |
| **Question 10:** | Are there any aerobic exercises, or types of aerobic exercises, that you believe breast cancer patients undergoing chemotherapy should avoid, and why? |
| **Question 11:** | Are there any aerobic exercises, or types of aerobic exercises, that you believe would be best suited to breast cancer patients undergoing chemotherapy, and why? |
| **Question 12:** | Are there any specific frequencies (number of sessions per week), durations (total minutes per session), or intensities of aerobic exercise that you believe breast cancer patients undergoing chemotherapy should avoid, and why? |
| **Question 13:** | Are there any specific frequencies (number of sessions per week), durations (total minutes per session), or intensities of aerobic exercise that you believe breast cancer patients undergoing chemotherapy would be best suited to, and why? |
| **Question 14:** | Additional Comments  *Please leave any additional thoughts or comments in the space provided. |

**Table 1**. Phase 1, round 1: open-ended questions presented to AEPs, oncologists, and breast cancer surgeons.

**Table 2.** Subjective questions derived from responses in phase 1, round 1, with agreement achieved for each question after each phase.

| **When conducting a subjective interview with a breast cancer patient undergoing chemotherapy, and exercise physiologist should discuss, question, and understand…** | | | | |
| --- | --- | --- | --- | --- |
| **Question** | **Phase 1 (n=9)** | | **Phase 2 (n=84)** | |
| **Agreement (%)** | **Median (IQR)** | **Agreement (%)** | **Median (IQR)** |
| The stage, type, and specific location of a patient's cancer. | 100 | 9 (0) | 91.7 | 9 (0) |
| The forms of treatment a patient has been/will be exposed to (i.e., surgery, radiation, chemotherapy). | 100 | 9 (0) | 97.6 | 9 (0) |
| A patient's surgery type and outcomes (i.e., mastectomy vs breast conserving, axillary dissection etc.) | 88.9 | 9 (0) | 94.0 | 9 (0) |
| A patient's fatigue levels (i.e., changes in fatigue in response to treatment, daily fluctuations). | 88.9 | 9 (0) | 97.6 | 9 (0) |
| A patient's nausea levels (i.e., changes in nausea in response to treatment, daily fluctuations). | 88.9 | 9 (1) | 95.2 | 9 (2) |
| A patient's changes in cognition. | 88.9 | 9 (1) | 90.5 | 9 (2) |
| A patient's dyspnoea experiences/symptoms. | 100 | 9 (1) | 95.2 | 9 (1) |
| A patient's peripheral neuropathy symptoms. | 100 | 9 (0.5) | 95.2 | 9 (1) |
| A patient's sleep quality since beginning treatment. | 77.8 | 7 (2.5) | 86.9 | 9 (2) |
| A patient’s weight changes since beginning treatment. | 77.8 | 8 (2.5) | 85.7 | 9 (2) |
| Any metastases a patient may have, including their location. | 100 | 9 (0) | 92.9 | 9 (0) |
| A patient's sites and severity of lymphedema. | 100 | 9 (1) | 95.2 | 9 (0) |
| If a patient has a port or peripherally inserted central catheter (PICC). | 88.9 | 9 (1.5) | 89.3 | 9 (0) |
| A patient's past medical history, including any co-morbidities and/or chronic health conditions. | 100 | 9 (0) | 96.4 | 9 (0) |
| A patient's cardiometabolic risk profile, including any history of heart disease, high blood pressure or type 2 diabetes. | 100 | 9 (1) | 96.4 | 9 (0) |
| The medications a patient is taking to manage any comorbidities/chronic health conditions. | 88.9 | 9 (1.5) | 96.4 | 9 (1) |
| A patient's current mental health status. | 88.9 | 9 (1.5) | 95.2 | 9 (1) |
| A patient's current pain experiences, including specific sites of pain. | 100 | 9 (0.5) | 96.4 | 9 (1) |
| Any physical weaknesses or limitations a patient may have (i.e., weakness of specific muscles, limitations in functional ability or aerobic fitness). | 100 | 9 (0.5) | 95.2 | 9 (1) |
| A patient's physical activity levels prior to breast cancer diagnosis. | 100 | 9 (0) | 88.1 | 9 (2) |
| A patient's current physical activity levels since breast cancer diagnosis. | 100 | 9 (0) | 96.4 | 9 (1) |
| A patient's physical activity/exercise preferences (i.e. likes and dislikes). | 100 | 9 (0) | 95.2 | 9 (1) |
| A patient's motivators to exercise during and following their treatment (i.e., for health benefit, or due to oncologist recommendation etc.) | 100 | 9 (0.5) | 94.0 | 9 (1) |
| A patient's short-term goals during their treatment. | 77.8 | 9 (1.5) | 95.2 | 9 (1) |
| A patient's long-term goals after their treatment (once in remission). | 88.9 | 9 (1) | 91.7 | 9 (1) |
| A patient's social and support networks (i.e., family, friends, access to facilities, travel arrangements). | 77.8 | 8 (2) | 85.7 | 8 (1) |
| A patient's work/family commitments during their treatment. | 100 | 9 (1) | 83.3 | 8 (2) |
| A patient's expectations after completing an exercise intervention. | 88.9 | 9 (1) | 90.5 | 9 (1) |
| The specific chemotherapy drugs and doses prescribed. | 33.3 | 5 (3) | Did not rate. | |
| A patient's blood count (red blood cell count, white blood cell count etc.) | 66.7 | 8 (3) | Did not rate. | |
| A patient's bladder and/or bowel function. | 66.7 | 8 (3) | Did not rate. | |
| A patient's dietary patterns prior to and since diagnosis. | 55.6 | 7 (3) | Did not rate. | |

n = number of participants in each phase. % = percentage. IQR = interquartile range. Did not rate = question was not presented to AEPs in phase two, as only the questions that met agreement in phase one were presented to AEPs in phase two.

**Table 3.** Objective assessments derived from responses in phase 1, round 1, with agreement achieved for each question after each phase.

| **Prior to prescribing and exercise intervention to a breast cancer patient undergoing chemotherapy, an exercise physiologist should test, measure and/or assess a patients…** | | | | |
| --- | --- | --- | --- | --- |
| **Question** | **Phase 1 (n=9)** | | **Phase 2 (n=80)** | |
| **Agreement (%)** | **Median (IQR)** | **Agreement (%)** | **Median (IQR)** |
| Resting blood pressure. | 88.9 | 9 (0) | 85.0 | 9 (2) |
| Resting heart rate. | 100 | 9 (0) | 78.8 | 8.5 (2) |
| Body composition (height, weight, BMI, waist circumference etc.) | 88.9 | 9 (2) | 65.0 | 7 (3) |
| Upper limb range of motion. | 88.9 | 9 (1) | 85.0 | 9 (2) |
| Upper limb strength (i.e. grip strength, bicep curl etc.) | 100 | 9 (1) | 86.3 | 9 (2) |
| Lower limb strength (i.e. sit to stand etc.) | 88.9 | 8 (1) | 87.5 | 8 (2) |
| Balance. | 77.8 | 9 (2.5) | 81.3 | 8 (2) |
| Aerobic capacity either directly (gas-analysis etc.) or in-directly (6-minute walk test, step test etc.) | 100 | 9 (0.5) | 90.0 | 8.5 (1) |
| Heart rate recovery from cardiovascular testing | 77.8 | 7 (1) | 76.3 | 8 (2) |
| Circumference measures of upper arm to measure risk of/changes in lymphedema. | 77.8 | 8 (2) | 72.5 | 8 (2.25) |
| Blood sugar levels (with finger prick or similar). | 11.1 | 5 (2) | Did not rate. | |
| Lower limb range of motion. | 55.6 | 8 (3) | Did not rate. | |
| Respiratory function (i.e. spirometry, SpO2% etc.) | 55.6 | 7 (3) | Did not rate. | |

n = number of participants in each phase. % = percentage. IQR = interquartile range. Did not rate = question was not presented to AEPs in phase two, as only the questions that met agreement in phase one were presented to AEPs in phase two. BMI = body mass index. SpO2% = oxygen saturation.

**Table 4.** Referral information derived from responses in phase 1, round 1, with agreement achieved for each question after each phase.

| **The following should be included in a referral to an exercise physiologist by an oncologist/GP for a breast cancer patient undergoing chemotherapy…** | | | | |
| --- | --- | --- | --- | --- |
| **Question** | **Phase 1 (n=9)** | | **Phase 2 (n= 79)** | |
| **Agreement (%)** | **Median (IQR)** | **Agreement (%)** | **Median (IQR)** |
| The sites of patient metastases. | 100 | 9 (0) | 96.2 | 9 (0) |
| Results from any scans performed (Echo, PET, CT, X-Ray, DEXA). | 77.8 | 9 (3) | 84.8 | 9 (2) |
| A patient's comorbidities/chronic health conditions. | 88.9 | 9 (0.5) | 98.7 | 9 (0) |
| A patient's medications related to any comorbidities/chronic health conditions. | 88.9 | 9 (2) | 96.2 | 9 (0.5) |
| Blood test results (i.e., white blood cell count, red blood cell count). | 66.7 | 7 (2) | Did not rate. | |
| Chemotherapy plan (including dose and type of drug, timing of chemotherapy etc.) | 55.6 | 7 (2) | Did not rate. | |
| Left ventricular ejection fraction (%). | 44.5 | 6 (2) | Did not rate. | |

n = number of participants in each phase. % = percentage. IQR = interquartile range. Did not rate = question was not presented to AEPs in phase two, as only the questions that met agreement in phase one were presented to AEPs in phase two.

**Table 5.** FITT principles derived from responses in phase 1, round 1, with agreement achieved for each principle after each phase.

| **Topic 1 – Methods for prescribing aerobic exercise intensity.** | | |
| --- | --- | --- |
| **Phase 1 (n=9)**  Most of the time, the best option for prescribing exercise intensity to breast cancer patients undergoing chemotherapy is…  ***note, clinicians could select more than one option.** | | |
| **Option** | **Agreement (%)** | **Median (IQR** |
| Percentage of Heart Rate Maximum (HRmax). | 66.7 | 7 (2) |
| Heart Rate Reserve (HRR) | 44.5 | 6 (2) |
| Percentage of VO2 Peak | 44.5 | 6 (3) |
| Ratings of Perceived Exertion (RPE) | 66.7 | 7 (3) |
| **Phase 2 (n=72)** | | |
| **Question** | **Agreement (%)** | **Median (IQR** |
| Heart rate (HR) and Ratings of Perceived Exertion (RPE) are appropriate to prescribe exercise intensity. | 91.7 | 9 (1) |
|  | | |
| **Topic 2 – Most appropriate aerobic exercise intensity.** | | |
| **Phase 1 (n=9)**    The most appropriate aerobic exercise intensity for breast cancer patients undergoing chemotherapy is… (If you believe a range of intensities i.e., light, or moderate is more appropriate then selecting one option, please select “other” and place the range you believe to be most appropriate in the text box).  ***note, this question was not rated on a Likert Scale.** | | |
| **Option** | **Agreement (%)** | **Median (IQR)** |
| Low | 0 | n/a |
| Moderate | 33.3 | n/a |
| Vigorous | 0 | n/a |
| High | 0 | n/a |
| Other (please specify) | 66.7 | All written responses suggest **moderate** intensity; however, also state individual circumstances may warrant low or vigorous intensity. |
| **Phase 2 (n=72)** | | |
| **Question** | **Agreement (%)** | **Median (IQR** |
| The most appropriate aerobic exercise intensity for breast cancer patients undergoing chemotherapy is moderate intensity (55-70% HRmax, RPE 12-14). | 69.4 | 7 (2) |
| Individual circumstances may warrant low or vigorous aerobic exercise intensities. | 91.7 | 9 (1) |
|  | | |
| **Topic 3 – Most appropriate aerobic exercise modality.** | | |
| **Phase 1 (n = 9)**  The most appropriate aerobic exercise modality(s) for breast cancer patients undergoing chemotherapy is/are…  ***note, clinicians could select more than one option. This question was not rated on a Likert Scale.** | | |
| **Option** | **Agreement (%)** | **Median (IQR)** |
| Walking | 66.7 | n/a |
| Cycling | 55.6 | n/a |
| Swimming | 33.3 | n/a |
| Running | 22.2 | n/a |
| Dancing | 33.3 | n/a |
| Arm Ergo | 33.3 | n/a |
| Cross Trainer | 11.1 | n/a |
| Recumbent Bike | 44.4 | n/a |
| Any form of aerobic exercise a patient enjoys/is capable of | 88.9 | n/a |
| **Phase 2 (n = 72)** | | |
| **Question** | **Agreement (%)** | **Median (IQR)** |
| The most appropriate aerobic exercise modality is any modality preferred by the patient, with cycling or walking most preferred AEPs, oncologists, and breast cancer surgeons. | 87.5 | 8 (2) |
|  | | |
| **Topic 4 – Most suitable aerobic exercise frequency.** | | |
| **Phase 1 (n=9)**  Most of the time, a suitable aerobic exercise frequency range (sessions per week) for breast cancer patients undergoing chemotherapy is… | | |
| **Option** | **Agreement (%)** | **Median (IQR)** |
| 1-3 sessions per week | 44.5 | 6 (6) |
| 3-5 sessions per week | 55.6 | 7 (4) |
| 5+ sessions per week | 22.2 | 4 (4) |
| **Phase 2 (n=72)** | | |
| **Question** | **Agreement (%)** | **Median (IQR)** |
| 3-5 sessions per week is the most suitable and/or appropriate aerobic exercise frequency for breast cancer patients undergoing chemotherapy. | 70.8 | 7 (3) |
|  | | |
| **Topic 5 – Most appropriate aerobic exercise duration.** | | |
| **Phase 1 (n=9)**  The most appropriate aerobic exercise duration (minutes achieved each day) for breast cancer patients undergoing chemotherapy is… (If you believe a range of durations i.e., 10 or 20 minutes is more appropriate then selecting one option, please select “other” and place the range you believe to be most appropriate in the text box).  ***note, this question was not rated on a Likert Scale.** | | |
| **Option** | **Agreement (%)** | **Median (IQR)** |
| 10 minutes | 0 | n/a |
| 20 minutes | 22.2 | n/a |
| 30 minutes | 33.3 | n/a |
| 40 minutes | 0 | n/a |
| 50 minutes | 0 | n/a |
| 60 minutes | 0 | n/a |
| > 60 minutes | 0 | n/a |
| Other (please specify) | 44.5 | All written responses suggest **20-30 minutes**; however, individual circumstances may warrant up to 60 minutes. |
| **Phase 2 (n=72)** | | |
| **Question** | **Agreement (%)** | **Median (IQR)** |
| 20-30 minutes per session is the most appropriate aerobic exercise duration for breast cancer patients undergoing chemotherapy. | 63.9 | 7 (2.25) |
| Individual circumstances may warrant aerobic exercises sessions up to 60 minutes in duration. | 70.8 | 8 (3) |
|  | | |
| **Topic 6 – Most appropriate aerobic exercise duration increments.** | | |
| **Phase 1 (n=9)**  If a patient cannot achieve recommended aerobic exercise durations in one bout (20-30mins), what would be the minimum increment range (in minutes) that aerobic exercise could be broken up into to still ensure cardiovascular and health benefits for these patients.  ***note, this question was not rated on a Likert Scale.** | | |
| **Option** | **Agreement (%)** | **Median (IQR)** |
| <5 minutes | 14.3 (2 missing answers) | 3 (3) |
| 5-9 minutes | 75 (1 missing answer) | 7.5 (3) |
| 10-15 minutes | 62.5 (1 missing answer) | 7 (2.5) |
| >15 minutes | 14.3 (2 missing answers) | 4 (2) |
| **Phase 2 (n=72)** | | |
| **Question** | **Agreement (%)** | **Median (IQR)** |
| Breaking aerobic exercise into 5-to-9-minute bouts to reach a total of 20-to-30 minutes per day is appropriate if required. | 84.7 | 9 (1) |
|  | | |
| **Topic 6 – Methods for monitoring exercise intensity.** | | |
| **Phase 1 (n=9)**  The following should be monitored on a patient when they are performing aerobic exercise under the supervision of an exercise physiologist... (please note you can select more than one answer).  ***note, this question was not rated on a Likert Scale.** | | |
| **Option** | **Agreement (%)** | **Median (IQR)** |
| Heart Rate | 100 | n/a |
| Oxygen Consumption (VO2) | 33.3 | n/a |
| Blood Pressure | 33.3 | n/a |
| Oxygen Saturation (SpO2) | 77.8 | n/a |
| Rating of Perceived Exertion (RPE) | 77.8 | n/a |
| Rating of Perceived Breathlessness | 44.4 | n/a |
| Rating of Perceived Pain | 55.6 | n/a |
| **Phase 2** | | |
| **Question** | **Agreement (%)** | **Median (IQR)** |
| Heart rate (HR), Ratings of Perceived Exertion (RPE) and Oxygen Saturation (SpO2) are appropriate to monitor exercise intensity. | 91.7 | 9 (1) |

**Table 6.** General exercise prescription recommendations derived from responses in phase 1, round 1, with agreement achieved for each question after each phase.

| **General exercise prescriptions recommendations.** | | | | |
| --- | --- | --- | --- | --- |
| **Question** | **Phase 1 (n = 9)** | | **Phase 2 (n = 72)** | |
| **Agreement (%)** | **Median (IQR)** | **Agreement (%)** | **Median (IQR)** |
| If a patient is unable to meet the FITT (frequency, intensity, time, type) principles proposed (i.e. the options you have selected above), the advice should be to reduce sedentary behaviour and avoid inactivity. | 88.9 | 9 (2) | 86.1 | 9 (1) |
| Exercise guidelines should always be adapted to a patient's individual circumstance and/or capabilities. | 100 | 9 (0) | 97.2 | 9 (0) |
| Exhaustive exercise (i.e. exercising to a state of exhaustion) should be avoided with breast cancer patients undergoing chemotherapy. | 77.8 | 8 (3) | 72.2 | 9 (3) |
| If possible, resistance training should be included alongside aerobic exercise in breast cancer patients undergoing chemotherapy. | 88.9 | 9 (0.5) | 95.8 | 9 (0) |
| A patient should be supervised by an exercise professional at all times when performing exercise in a gym/recreational facility (i.e. not at home). | 11.1 | 3 (3) | Did not rate. | |
| Advising a patient to achieve 75 minutes of vigorous or 150 minutes of moderate intensity exercise per week (as recommended by physical activity guidelines) is an appropriate recommendation for the majority of patients undergoing chemotherapy for breast cancer. | 44.5 | 6 (3) | Did not rate. | |
| The physical and exercise capabilities of breast cancer patients undergoing chemotherapy are often underestimated i.e. they can do more than often anticipated. | 44.5 | 6 (2) | Did not rate. | |

n = number of participants in each phase. % = percentage. IQR = interquartile range. Did not rate = question was not presented to AEPs in phase two, as only the questions that met agreement in phase one were presented to AEPs in phase two.
